# Supplementary material for: Biological Activities of Cationicity-Enhanced and Hydrophobicity-Optimized Analogues of an Antimicrobial Peptide, Dermaseptin-PS3, from the Skin Secretion of Phyllomedusa sauvagii
Source: PubMed Central journal article supplement (PMC6115755; doi:10.3390/toxins10080320), 2018-08-07
Supplement: toxins-10-00320-s001.pdf [file toxins-10-00320-s001.pdf]

# Supplementary Materials: Biological Activities of Cationicity-Enhanced and Hydrophobicity-Optimized Analogues of an Antimicrobial Peptide, Dermaseptin-PS3, from the Skin Secretion of *Phyllomedusa sauvagii*

Yining Tan, Xiaoling Chen, Chengbang Ma, Xinping Xi, Lei Wang, Mei Zhou, James F. Burrows, Hang Fai Kwok and Tianbao Chen

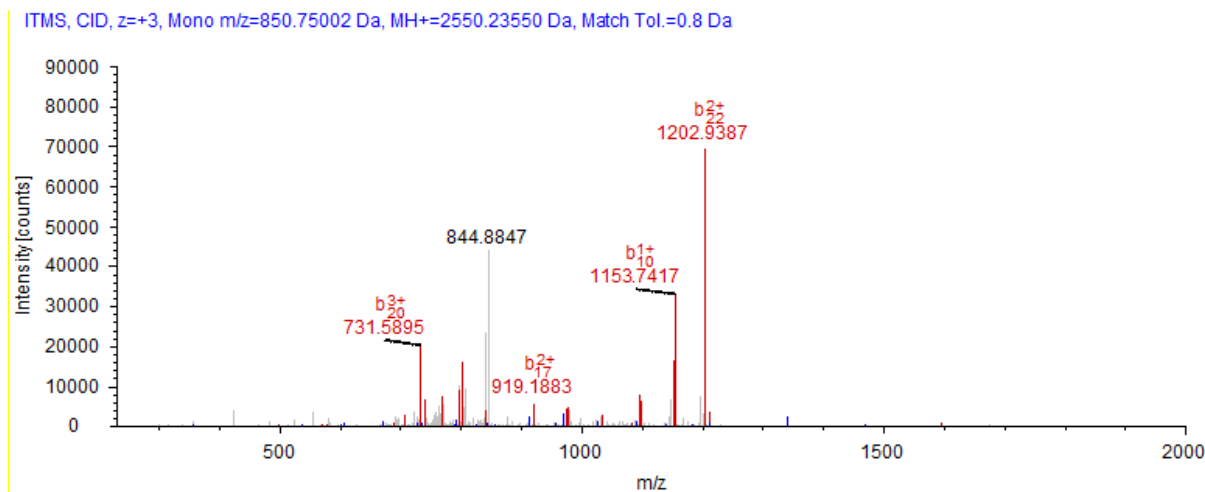

Figure S1. Annotated fragment ion spectrum of DPS3.

| Name           | Sequence                                           | Reference |
|----------------|----------------------------------------------------|-----------|
| DRS-LIKE       | ALW-----KDVLKKIGTVALHAGKAALGAVADTISQ---            | [5]       |
| DPS1           | ALW-----KTMLKKLGTMALHAGKAALGAAADTISQGTQ            | a         |
| DRS-S2         | ALW-----FTMLKKLGTMALHAGKAALGAAANTISQGTQ            | [19]      |
| DRS-B2         | GLWSKIKEVGKEAAKAAAKA---AGKAALGAVSEAV-----          | [8]       |
| DPS2           | ALW-----KTLLKNVKGK---AGKAVLNAVTDMVNQGEQ            | [20]      |
| Dermaseptin-PH | ALW-----KEVLKN-----AGKAALNEINNVLVQGGQ-             | [3]       |
| DRS-B6         | ALW-----KDILKN-----AGKAALNEINQLVNQ---              | [1]       |
| DPS3           | ALW-----KDILKN-----AGKAALNEINQIVQ----              | [1]       |
|                | **                    *                    ****  * |           |

Figure S2. Alignment of amino acid sequences of DPS3 and other dermaseptins. The corresponding references are showed behind. "a": The sequence of DPS1 is obtained from GenBank database under the accession no. of SIW62024. The identical amino acid residues are indicated by asterisks..
